# Supplementary material
Source: HighWire-hosted journal article supplement (http://www.cfp.ca/highwire/filestream/32999/field_highwire_adjunct_files/0/111_Cannabinoid_Guideline_Disclosure_of_Conflicts.pdf)
Supplement: 111_Cannabinoid_Guideline_Disclosure_of_Conflicts.pdf [file 111_Cannabinoid_Guideline_Disclosure_of_Conflicts.pdf]

### Medical Cannabinoids in Primary Care Prescribing Guideline Contributors Disclosed Conflicts of Interest

| Name             | Affiliation                                                                                                                        | Written articles*                                              | Presented*                                                                   | Created apps, software, tools, etc.* | Advisory Board**                                      | Speakers' Bureau** | Payment** | Grant(s) or Honorarium** | Patent | Investments                       | Clinical Trial                                                                                                           |
|------------------|------------------------------------------------------------------------------------------------------------------------------------|----------------------------------------------------------------|------------------------------------------------------------------------------|--------------------------------------|-------------------------------------------------------|--------------------|-----------|--------------------------|--------|-----------------------------------|--------------------------------------------------------------------------------------------------------------------------|
| G. Michael Allan | Professor and Director of EBM, Dept of Family Medicine, U of A. Director of Evidence and CPD, Alberta College of Family Physicians | Written "Tools for Practice", editorials and research articles | On evidence surrounding cannabinoid use for medical conditions in Canada     | No, but will be working on one       | X                                                     | X                  | X         | X                        | X      | X                                 | X                                                                                                                        |
| Xiaofu Zhu       | Medical Oncologist, Cross Cancer Institute                                                                                         | X                                                              | X                                                                            | X                                    | Shire 2017                                            | X                  | X         | X                        | X      | Index Fund with S&P 500 Companies | Bristol-Myers Squibb (CheckMate 649 trial), Cascadian Therapeutics (HER2CLIMB trial, Nektar Therapeutics (ATTAIN trial)) |
| Ted Findlay      | Consultant, AHS Chronic Pain Centre, Clinical Assistant Professor, University of Calgary                                           | X                                                              | X                                                                            | X                                    | X                                                     | X                  | X         | X                        | X      | X                                 | X                                                                                                                        |
| Ruth Dubin       | Assistant Professor, Queens University and Northern Ontario School of Medicine                                                     | Worked on CFPC preliminary guidance document                   | Presented on risks, harms and benefits of cannabinoids to CFPC, ECHO Ontario | X                                    | X                                                     | X                  | X         | X                        | X      | X                                 | X                                                                                                                        |
| Nicole Crisp     | NP-Adult, Division of Hematology, University of Alberta Hospital                                                                   | X                                                              | X                                                                            | X                                    | International Nurse Advisory Panel for MSD Foundation | X                  | X         | X                        | X      | X                                 | Sub-investigator on clinical trials for MDS/AML with Pfizer, Merck,                                                      |



|                    |                                                                                             |   |                                                       |   |   |   |   |   |   |   |   |
|--------------------|---------------------------------------------------------------------------------------------|---|-------------------------------------------------------|---|---|---|---|---|---|---|---|
| Christina Korownyk | Associate Professor, Evidence-Based Medicine, Dept of Family Medicine University of Alberta | X | X                                                     | X | X | X | X | X | X | X | X |
| Michael R Kolber   | Associate Professor, Evidence-Based Medicine, Dept of Family Medicine University of Alberta | X | X                                                     | X | X | X | X | X | X | X | X |
| James McCormack    | Professor, Faculty of Pharmaceutical Sciences, University of British Columbia               | X | X                                                     | X | X | X | X | X | X | X | X |
| Sharon Nickel      | Coordinator, Evidence-Based Medicine and CPD Program, Alberta College of Family Physicians  | X | X                                                     | X | X | X | X | X | X | X | X |
| Jamil Ramji        | Knowledge Translation Expert, Evidence-Based Medicine, Department of Family Medicine &      | X | PharmD assignment on medical marijuana for spasticity | X | X | X | X | X | X | X | X |



|                  |                                                                                                                                             |   |   |                                      |   |   |   |   |   |   |   |
|------------------|---------------------------------------------------------------------------------------------------------------------------------------------|---|---|--------------------------------------|---|---|---|---|---|---|---|
|                  | Lifelong Learning/Physician Learning Program, University of Alberta                                                                         |   |   |                                      |   |   |   |   |   |   |   |
| Guillermina Noël | Health Innovation Studio Lead & Human-centred Knowledge Designer, Lifelong Learning, Faculty of Medicine & Dentistry, University of Alberta | X | X | Knowledge dissemination tool (CADTH) | X | X | X | X | X | X | X |

\*on topics related to the guidelines (such as cannabinoid use for medical conditions)

\*\*from a commercial organization

Peer Reviews: list of Peer Reviews available on request.

Supplemental material for: Allan GM, Finley CR, Ton J, Perry D, Ramji J, Crawford K, Lindblad AJ, Korownyk C, Kolber MR. Systematic Review of Systematic Reviews on Medical Cannabinoids for Pain, Nausea/Vomiting, Spasticity, and Harms. Can Fam Physician 2018;
